# Supplementary material
Source: publisher figshare collection journal article supplement (https://gsapubs.figshare.com/ndownloader/files/23300759)
Supplement: Supplementary file 1 [file 23300759]

## Sheet: Sheet2
Heavy Mineral	12AM111	11AM25	11AM26	11AM32	11AM23	11AM91	11AM22	11AM27	11AM45	12AM95	12AM106	11AM02	11AM10	11AM86	11AM04	11AM07	11AM08	11AM19	11AM55	11AM46	11AM52	12AM141	12AM142	11AM15	11AM71	12AM145
Zircon- Monazite	13.5	1.16	2.24	12.5	21.17	12.97	8.93	19.33	3.9	18.3	9.26	23.43	37.3	8.39	2.32	53.86	45.64	2.92	13.96	13.51	3.9	11.66	16.34	34.37	7.84	16.27
Tourmaline	34.38	1.18	0	6.47	11.15	23.71	30.48	3.33	22.72	18.98	6.97	26.89	17.98	4.74	32.55	9.9	13.65	4.15	42.44	3.4	8.21	9.21	12.3	21.42	42.38	16.74
Rutile, Brookite, Anatase, Sphene	4.95	0.58	0.74	18.55	1.38	0.38	1.2	1.11	1.56	5.86	5.08	3.11	2	5.47	0.66	12.38	10.31	2.95	0	1	3.89	6.37	4.61	2	1.1	11.44
Spinel	0.7	0	0	0	6.94	3.05	1.2	5.18	4.68	11.13	5.58	5.51	2.27	0.72	2.01	4.64	3.78	2.92	1.46	0	1.29	0	0	1.6	3.3	1.76
Apatite	21.99	7.07	12.73	7.37	15.68	12.59	38.27	13.7	16.4	28.1	3.82	14.23	11.94	15.34	19.26	17.95	23.36	8.89	17.26	10	16.95	6.42	8.46	20.91	26.99	7.48
Epidote group	5.65	0.58	1.18	10.98	14.56	5.34	6.9	21.11	34.36	7.18	28.35	14.1	3.4	16.78	23.12	0	0	26.69	5.84	10.7	10.81	13.5	15.36	10.1	5.5	3.96
Hornblende	0.7	0	0	0	3.12	0	0	0	0	0	0	0	0	9.12	0	0	0	0	0	0	0	0	0	0	0	23.78
Garnet	11.38	0.28	0	29.44	2.77	27.48	9.34	0.75	4.68	0.65	16.27	5.51	23.07	15.69	7.71	0	0	43.19	7.35	5.5	19.04	42.13	42.4	4	11.24	0
Amphibole	0	0	0	0	4.16	1.14	0	0.37	1.56	0	7.52	0	0	0	0.33	0	0	0	0	0.5	0	1.41	0	0	0	15.45
Blue Amphibole	0	0	0	0	9.37	6.1	0	0	4.68	0	0	0	0	21.97	0	1.27	3.26	0	0	0.5	0	0	0	0	0	0.88
Pyroxene group	0	88.57	82.42	9.19	4.16	3.05	0	17.97	2.34	1.96	7.4	2.4	0.57	1.44	2	0	0	1.19	0	19.39	19.47	0	0	0.8	1.1	0.88
Staurolite	0.7	0	0	0	2.77	1.17	0	0.37	0.78	0	0	3.44		0	7.71	0	0	0	10.23	19.5	9.53	2.12	0	3.2	0	0
Chloritoid	4.24	0	0	0	0	0	3.68	0	0	5.88	3.25	0	0	0	0	0	0	3.56	0	0	0	2.82	0	0	0.55	0
kyanite	0	0.58	0	5.5	2.43	2.29	0	7.4	1.56	1.96	5.11	0	0	0	1.67	0	0	2.36	0	7	3.03	2.82	0	0.4	0	0
Andalusite	0.7	0	0	0	0.34	0.73	0	9.38	0.78	0	1.39	0	0	0	0.66	0	0	0	0	9	3.88	0	0	1.2	0	0
Others >1%	1.11	0	0.69	0	0	0	0	0	0	0	0	1.38	1.47	0.34	0	0	0	1.18	1.46	0	0	1.54	0.53	0	0	1.36
	100	100	100	100	100	100	100	100	100	100	100	100	100	100	100	100	100	100	100	100	100	100	100	100	100	100
	12AM111	11AM25	11AM26	11AM32	11AM23	11AM91	11AM22	11AM27	11AM45	12AM95	12AM106	11AM02	11AM10	11AM86	11AM04	11AM07	11AM08	11AM19	11AM55	11AM46	11AM52	12AM141	12AM142	11AM15	11AM71	12AM145
ZTR	45.47	1.18	2.24	15.63	32.66	34.01	40.18	12.27	28.18	37.93	14.85	52.41	52.78	13.1	33.88	67.79	62.5	7.07	55.67	7.41	11.67	21.99	23.8	57.39	51.32	33.03
Apatite/Tourmaline (ATi)	39.74	85.71	100	53.33	58.44	35.1	55.62	80.43	42	49.12	34.78	34.45	40	76.36	37.01	64.44	63.23	68.18	27.84	74.07	68.42	10.9	40.7	49.51	39.2	30
Garnet/ Zircon (GZi)	48.48	0	0	78.04	12.12	72.72	52.27	8.69	54.54	3.44	72.91	19.51	40.29	65.15	88.46	0	0	93.5	35.71	64.7	84.61	79.45	7.14	10.75	58.82	65
TiO2/Zircon (RZi)	5.55	0	0	35.71	6.45	3.57	12.5	12.5	28.57	3.44	31.57	10.81	1.63	0	25	10.69	12.22	0	0	25	20	16.66	0	5.68	12.5	21.6
Spinel/Zircon (CZi)	5.55	0	0	0	25.64	22.85	12.5	40	54.54	37.77	48	19.51	6.25	8	66.66	8.24	8.13	50	10	0	27.27	0	0	4.59	30	12.12
Monazite/Zircon (MZi)	10.52	100	40	0	4.91	18.18	4.54	59.61	0	0	35	2.94	9.77	0	57.14	4.02	5.95	0	5.26	75	11.11	0	25	1.19	0	21.6
	12AM111	11AM25	11AM26	11AM32	11AM23	11AM91	11AM22	11AM27	11AM45	12AM95	12AM106	11AM02	11AM10	11AM86	11AM04	11AM07	11AM08	11AM19	11AM55	11AM46	11AM52	12AM141	12AM142	11AM15	11AM71	12AM145
ZTR	52.83	2.92	2.98	37.52	33.7	37.06	40.61	23.77	28.18	43.14	21.31	53.43	57.28	18.6	35.53	76.14	69.6	10.02	56.4	17.91	16	27.24	33.25	57.79	51.32	47.45
MET	17.03	0.86	1.18	40.42	17.33	32.82	16.24	21.86	39.04	7.83	44.62	19.52	26.47	32.47	30.83	0	0	69.88	13.19	16.2	29.85	55.63	57.76	14.1	16.74	3.96
VOL	0.7	88.57	82.42	9.19	7.28	3.43	0	17.97	2.34	1.96	7.4	2.4	0.57	1.44	2	0	0	1.19	0	19.39	19.47	0	0	0.8	1.1	24.66
Total %	70.56	92.35	86.58	87.13	58.31	73.31	56.85	63.6	69.56	52.93	73.33	75.35	84.32	52.51	68.36	76.14	69.6	81.09	69.59	53.5	65.32	82.87	91.01	72.69	69.16	76.07
	12AM111	11AM25	11AM26	11AM32	11AM23	11AM91	11AM22	11AM27	11AM45	12AM95	12AM106	11AM02	11AM10	11AM86	11AM04	11AM07	11AM08	11AM19	11AM55	11AM46	11AM52	12AM141	12AM142	11AM15	11AM71	12AM145
ZTR	74.87	3.16	3.44	43.07	57.79	50.57	71.44	37.37	40.52	81.51	29.07	70.9	67.93	35.42	51.97	100	100	12.35	81.05	33.47	24.49	32.87	36.54	79.5	74.2	62.37
MET	24.14	0.94	1.37	46.39	29.73	44.76	28.56	34.37	56.12	14.79	60.84	25.92	31.39	61.83	45.09	0	0	86.17	18.95	30.29	45.69	67.13	63.46	19.39	24.21	5.16
VOL	0.99	95.9	95.19	10.54	12.48	4.67	0	28.26	3.36	3.7	10.09	3.18	0.68	2.75	2.94	0	0	1.48	0	36.24	29.82	0	0	1.11	1.59	32.47
Total % (Final)	100	100	100	100	100	100	100	100	100	100	100	100	100	100	100	100	100	100	100	100	100	100	100	100	100	100
(% Zircon + Turmalin + Rutile)	ZTR
100x apatite/(total apatite + tourmaline)	ATi
100x garnet/(total garnet + zircon)	GZi
100x TiO2 group/(total TiO2 group + zircon)	RZi
100x chrome-spinel/(total chrome-spinel + zircon)	CZi
100x monazite/(total monazite + zircon)	MZi
Zircon+Monazite+ Tourmaline+ Rutile+Brookite+Anatas+ Sphene	ZTR
Garnet +Epidote group	MET
Hornblende + pyroxene group	VOL
